# Supplementary material for: Up-regulation of Lamin A/C Expression in Epstein-Barr Virus Immortalized B Cells and Burkitt Lymphoma Cell Lines of Activated B Cell Phenotype
Source: Preprints.org preprint supplement (doi:10.20944/preprints201611.0125.v1), 2016-11-24
Supplement: Supplementary file 1 [file supplementary]

**Table S1.** List of primers used in the experiments

| **Primer name** | **Primer sequences** | **Primer positions on the reference sequences** | **Method;**  **NCBI Accession numbers** |
| --- | --- | --- | --- |
| LPR-F1 | 5'-gag tat ggt gct ggc ctt tgc-3' | 3890 | DNA control sequencing;  NG_008692.1 |
| LPR-F2 | 5'-cac tga gat gca gct ctg aat gg-3' | 4514 |
| LPR-F3 | 5'-ttg agc ctc acg cag tta gg-3' | 4850 |
| LPR-R1 | 5'-gat cat tga gct cct gca ggt c-3' | 5370 |
| LPR-R1b | 5'-aga ctg ctc gga gtc gga gtg-3' | 5166 |
| LPR-R2 | 5'-tca ccc ttc ttc cac cac tgg-3' | 4619 |
| LPR-R2b | 5'-aag gac cgt tgg ggt gtg g-3' | 4919 |
| LPR-mod-K1 | 5'-ctc aaa ttc caa aac ttt act cc-3' | 4448 | Bisulfite sequencing;  NG_008692.1 |
| LPR-mod-K2 | 5'-gtt aag yga tta ttg agt ttt tg-3' | 5377 |
| LPR-mod-UF1 | 5'- *M13 univ seq1-* att cct tct cca ccc cac tc-3' | 4488 |
| LPR-mod-UF2 | 5'- *M13 univ seq-* cta ata aac acc aac ctc aac c-3' | 4627 |
| LPR-mod-UF3 | 5'- *M13 univ seq-* tcc tta act cta ccc tct aac-3' | 4754 |
| LPR-mod-BF3 | 5'-Biotin-tcc tta act cta ccc tct aac-3' | 4754 |
| LPR-mod-UR1 | 5'- *M13 univ seq-* agy gat tat tga gtt ttt gta gg-3' | 5373 |
| LPR-mod-UR2 | 5'- *M13 univ seq-* ggg tyg aag gat aga gat tgt-3' | 5190 |
| LPR-mod-UR3 | 5'- *M13 univ seq-* ggg taa agg ttt taa tag gt-3' | 5026 |
| LPR-mod-BR4 | 5'-Biotin-gaa gga tyg ttg ggg tgt g-3' | 4920 |
| LMN-RT1 | 5'-gag ttg atg aga gcc gta c-3' | 23052 | Reverse transcription;  NG_008692.1  NG_007073 |
| GAPDH-RT | 5'-ctt gat ttt gga ggg atc-3' | 7451 |
| LMP1-RT | 5'-tgt aac gca act aag tca tag-3' | 168897 |
| LMN-rlt1 | 5'-gtc caa tga g /splice/ ga cca gtc cat g-3' | 21758→21767/22252→22263 | Real-time quantitative PCR in expression study and AzaC treatment;  NG_008692.1  NG_007073  V01555 |
| LMN-rlt2 | 5'-tgt tct gtg cct tcc aca cca g-3' | 22510 |
| GAPDH-up | 5'-gga agg tga agg tcg gag tca-3' | 5347 |
| GAPDH-low | 5'-atg ggt gga atc ata ttg gaa ca-3' | 7223 |
| LMP1 codL | 5'-gag cag gag ggt ga /splice/ t cat cag-3' | (169119–169128 /169207–169213) |
| LMP1 codU | 5'-cgc tac tgt ttt ggc tgt aca tc-3' | (169371–169349) |
| LPR-498F | 5'-cac tcc tgg cac act gag atg ca-3' | 4503 | Real-time quantitative PCR in ChIP experiments;  NG_008692.1 |
| LPR-R2up | 5'-tca ccc ttc ttc cac cac tgg-3' | 4619 |
| LPR+335F | 5'-tgc agg aga agg agg acc tg-3' | 5335 |
| LPR+484R | 5'-cct tga tgc cgg aca cct c-3' | 5484 |

*1M13 univ. seq.:* 5’-gta aaa cga cgg cca gt-3’
